# Supplementary material for: New Zn2+ coordination polymers with mixed triazolate/tetrazolate and acylhydrazidate as linkers
Source: Royal Society of Chemistry journal article supplement (doi:10.1039/c3ce42426j), 2014-01-01
Supplement: c3ce42426j1.pdf [file c3ce42426j1.pdf]

## Supporting materials

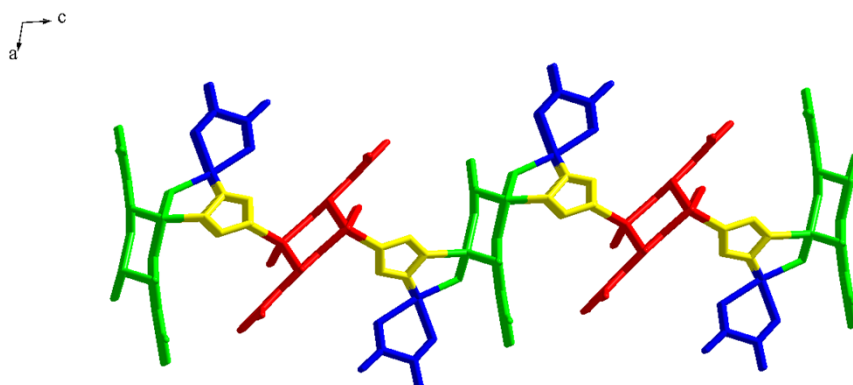

Fig S1 The projection plot of compound 4 in (010) direction.

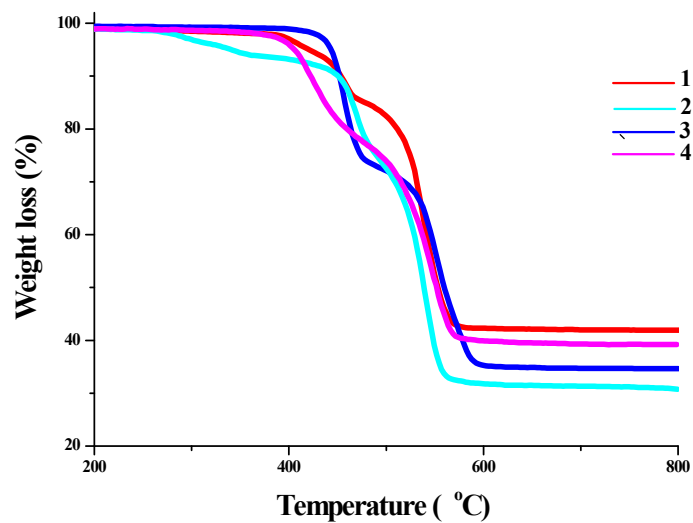

Fig. S2 The TG curve of compounds 1-4.

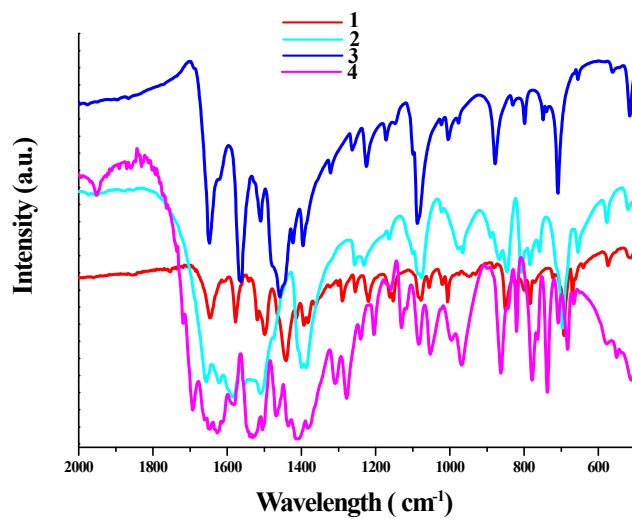

Fig. S3 The IR spectra of the title compounds.

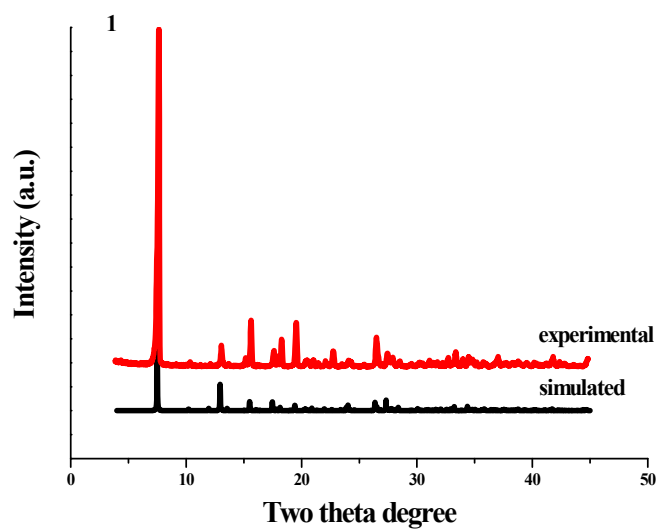

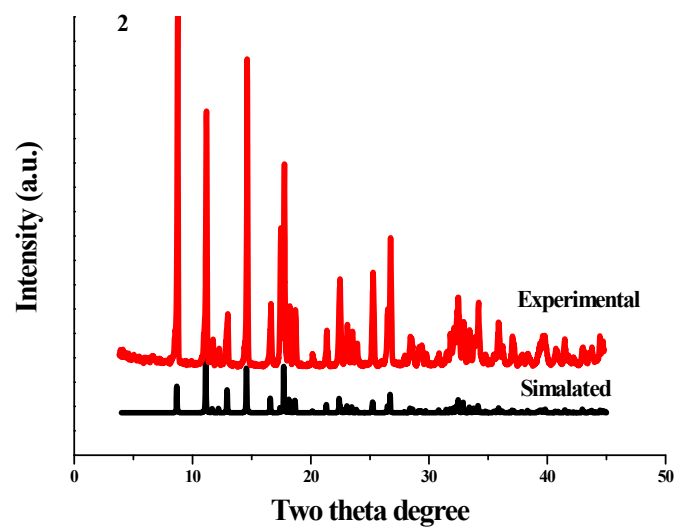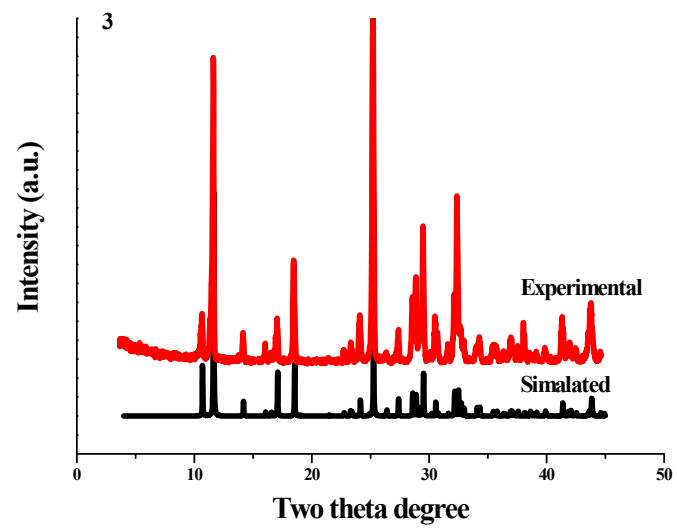

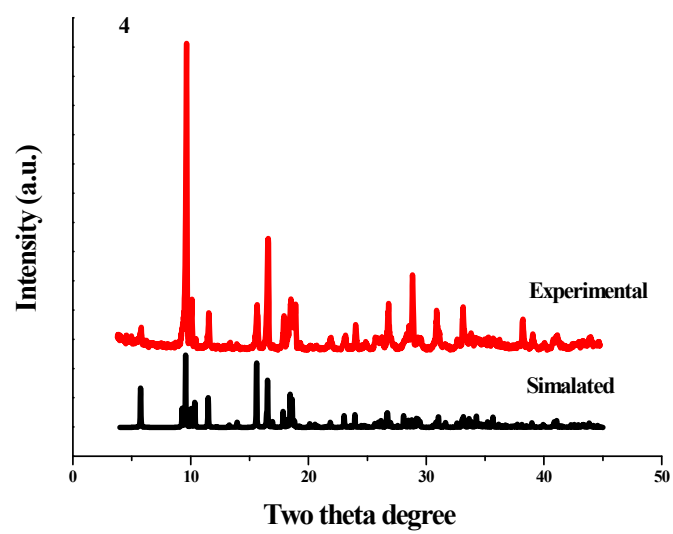

Fig. S4 The simulated (black) and experimental (red) powder XRD patterns for the title compounds.
